## Social and non-social functions of infant vocalizations

1 **Helen L. Long<sup>1\*</sup>, Dale Bowman<sup>2</sup>, Hyunjoo Yoo<sup>3</sup>, Megan M. Burkhardt-Reed<sup>1</sup>, Edina R.**  
2 **Bene<sup>1</sup>, D. Kimbrough Oller<sup>1, 4, 5</sup>**

3 <sup>1</sup> Infant Vocalizations Laboratory, School of Communication Sciences and Disorders, University  
4 of Memphis, Memphis, Tennessee, United States of America

5 <sup>2</sup> Department of Mathematics, University of Memphis, Memphis, Tennessee, United States of  
6 America

7 <sup>3</sup> Department of Communicative Disorders, College of Arts & Sciences, The University of  
8 Alabama, Tuscaloosa, Alabama, United States of America

9 <sup>4</sup> Institute for Intelligent Systems, University of Memphis, Memphis, Tennessee, United States of  
10 America

11 <sup>5</sup> Konrad Lorenz Institute for Evolution and Cognition Research, Klosterneuburg, Austria

12

13 \* Corresponding author

14 **Email:** hlong@memphis.edu

15

16 HLL, DB, and DKO contributed to the design, analysis, interpretation, writing, and review of  
17 this work. HY, MMB-R, and ERB contributed to the interpretation and review of this work.

18

19 **Competing Interests:** The authors have declared that no competing interests exist.

20 **Data Availability Statement:** The recordings cannot be made publicly available because the  
21 conditions of IRB approval for making the recordings do not include permission from the parents  
22 to make the recordings publicly available. To provide the raw recordings would violate the  
23 confidentiality requirements of the data collection. We can supply the data worksheets including  
24 durations and counts obtained from coders. From these sheets all the calculations have been  
25 made that are included in the paper.

## SOCIAL AND NON-SOCIAL FUNCTIONS OF INFANT VOCALIZATIONS

### 26 **Abstract**

27 Research on infant vocal development is focused primarily on vocal interaction with caregivers,  
28 where it appears to be largely assumed that infants vocalize mostly for the purpose of interaction.  
29 A survey of both parents and non-parents indicated that public opinion conformed to the  
30 expectation that infant vocalization is mostly socially interactive. However, we report that in  
31 laboratory recordings of infants and their parents, the bulk of infant speech-like vocalizations  
32 (“protophones”) were directed toward no one, and instead appeared to be generated  
33 endogenously in exploration of vocal abilities. The tendency to produce protophones without  
34 directing them to others occurred both during periods when parents were instructed to interact  
35 with their infants *and* during periods when parents were occupied with an interviewer, with the  
36 infants in the room. The results emphasize the infant as an agent in vocal learning, not as a  
37 passive recipient of vocal input.

38 **Keywords:** Speech development<sup>1</sup>, Social interaction<sup>2</sup>, Illocutionary force<sup>3</sup>, Prelinguistic  
39 communication<sup>4</sup>, Origin of language<sup>5</sup>, Language development<sup>6</sup>, Evolutionary-development<sup>7</sup>

40

## SOCIAL AND NON-SOCIAL FUNCTIONS OF INFANT VOCALIZATIONS

### 41 **1 Introduction**

42 The study of vocal development has been dominated by the expectation that infants primarily  
43 vocalize in a speech-like manner when they are in social engagement, an expectation suggesting  
44 social interaction drives prelinguistic vocal development (1–6). Granted, social learning is  
45 required in order for infants to acquire the language-specific syllables and phonemic elements  
46 and the largely arbitrary pairings of words with meanings in languages. Thus, there can be no  
47 doubt that social interaction plays a critical role in infant vocal learning and language  
48 acquisition. Surprisingly, however, we know little about the extent to which infants actually  
49 engage in directed vocal interaction using the speech-like sounds or “protophones” of infancy  
50 (which include both canonical babbling and precanonical speech precursors in accord with the  
51 terminology of Oller, 2000), as opposed to simply vocalizing playfully or exploratorily. The  
52 proportion of infant protophones that are socially-directed has, to our knowledge, never been  
53 previously quantified, so the extent to which infant protophone production may be primarily  
54 endogenous rather than social is unknown.

55 Even so, infant vocalization, especially in the context of social interaction, has been researched  
56 for half a century (8–13). A social feedback loop has been posited to exist in infant and child  
57 vocalization, and that loop has been thought to promote contingent infant vocalizations with  
58 respect to caregiver vocalizations (14–17). Experimental studies in the still-face paradigm (18)  
59 have shown that by 5-6 months of age, infants increase the rate of protophone production when  
60 the parent disengages from an ongoing vocal interaction (19,20), suggesting infants by that age  
61 seek to repair broken interactions with increased vocalization.

## SOCIAL AND NON-SOCIAL FUNCTIONS OF INFANT VOCALIZATIONS

62 The long tradition of research in infant attachment and bonding (21–24) has included a distinct  
63 emphasis on the parent-infant dyad as the fundamental unit of human social and emotional  
64 development. Winnicott (6) went so far as to say that “there is no such thing as an infant,”  
65 highlighting the idea that without a mother, an infant cannot exist. But the idea has been taken  
66 too far, we think, being interpreted to imply that research on human infancy should emphasize  
67 the dyad to the near exclusion of interest in the independent infant as an agent in its  
68 development.

69 The low level of focus on the infant as an agent of vocal development in prior research might be  
70 in part an unintended consequence of the radical behaviorist tradition that for many decades  
71 treated behaviors as *responses* rather than *actions* (25,26). Panksepp and his colleagues have  
72 argued forcefully that we have not overcome the legacy of that radical behaviorism, and that  
73 even modern cognitive psychology continues to underplay the endogenous, emotion-driven  
74 actions of both humans and non-humans (27–30).

75 Breaking with the dominant tradition of infant development research, a role for intrinsic  
76 motivation as a primary mechanism to support vocal development has recently received  
77 increased attention (31–33). In the Supplementary Material to a published article based on  
78 recordings made in our own laboratory, we reported that infants across the first year of life  
79 produced the majority of their protophones when gaze was *not directed* toward another person  
80 (34). Also in a small-scale study with just 16 minutes of recording per infant at 6-8 months,  
81 infants produced more vocalizations when playing alone with toys than when engaged socially  
82 (35). Another recent observational study found no significant difference in protophone volubility  
83 between a recording circumstance where parents talked to infants compared to circumstances

## SOCIAL AND NON-SOCIAL FUNCTIONS OF INFANT VOCALIZATIONS

84 where parents were in the same room and silent or not present in the room at all, suggesting that  
85 infants had an “independent inclination to vocalize spontaneously” (p. 481) (36) in the absence  
86 of social interaction. Importantly, the rate of protophone production has been reported to be very  
87 high, >4 protophones per minute during all-day audio recordings, across the entire first year, and  
88 even when infants were judged to be alone in a room, the rate was >3 per minute (37).

89 These findings suggest vocalizations are commonly produced with non-social functions. In other  
90 words, infants in these prior studies appear to have been intrinsically motivated to explore or  
91 practice sounds, in essence to play with sensorimotor aspects of sound production, although the  
92 evidence has been indirect. We propose that this vocal exploration may have a deeply significant  
93 role in vocal development, alongside the support of caregiver interaction and ambient language  
94 exposure.

95 In spite of the possible importance of exploratory vocalizations in language development, to our  
96 knowledge there is no published evidence specifically targeting the social-directivity of infant  
97 protophones or the lack of it. As noted above, existing evidence about social-directivity of infant  
98 protophones is indirect. The necessary work requires considering gaze direction during infant  
99 vocalization and the extent to which infants may bid for attention vocally even when they are not  
100 in the same room with caregivers. It also requires taking into account the relative timing of infant  
101 and caregiver utterances as well as the content of utterances of adults who are present at the time  
102 of the recording, especially caregivers who presumably know a good deal about the capabilities  
103 of a particular infant. Only with such work will it be possible to reliably quantify proportions of  
104 non-socially-directed infant protophones compared with rates of socially-directed ones.

## SOCIAL AND NON-SOCIAL FUNCTIONS OF INFANT VOCALIZATIONS

105 Furthermore, we deem it important that such quantification be established *across contexts* in the  
106 first year of life. Prior studies suggest the proportions of non-socially directed sounds may be  
107 high, but appropriate research requires direct comparison in different circumstances of potential  
108 interaction, especially when caregivers are attempting to interact with infants and when not.  
109 Providing such quantification may highlight the importance of endogenously generated self-  
110 organization in prelinguistic vocal development (31,33) and may help establish perspective about  
111 relative roles of endogenous and interactive factors in vocal development.

112 Our approach to placing these issues in perspective not only takes stock of the vast literature on  
113 infant development, where endogenous vocalization has overwhelmingly taken a distant back  
114 seat to social interaction, but also considers the impressions of parents and potential parents  
115 obtained through a survey about the relative roles of endogenous and social vocalization in infant  
116 development. We compare the survey data with careful counts of recorded infant protophones  
117 both when they appear to be directed socially and when they appear to serve endogenous  
118 purposes of the infant.

### 119 **1.1 Specific aims and hypothesis**

120 Our primary goal is to determine the extent to which infants produce vocalizations in two ways:  
121 *With* and *without* social directivity at three ages across the first year of life, and in two  
122 circumstances: An *Interactive* circumstance, where the parent is instructed to interact with the  
123 infant, and a *Non-Interactive* circumstance, where the parent is present but engaged in a separate  
124 conversation with an adult. This quantification is hoped to provide a standard against which the  
125 traditional view of infant protophones as being predominantly a social phenomenon can be  
126 judged. As a precursor to the primary goal, we sought survey data where both parents and non-

## SOCIAL AND NON-SOCIAL FUNCTIONS OF INFANT VOCALIZATIONS

127 parents were asked to provide estimates of how often they thought infants vocalized with social  
128 directivity and without social directivity based solely on a reflection of their own experiences  
129 around infants. In this study, we hypothesize that:

- 130 1. **Part 1: Opinion survey on the function of infant vocalizations.** Survey participants will  
131 provide evidence supporting the general impression of the literature on vocal development,  
132 an impression suggesting that socially-directed vocalization is predominant, while non-  
133 socially-directed vocalization is relatively uncommon.
- 134 2. **Part 2: Observational study on the function of infant vocalizations.** In naturalistic  
135 laboratory recordings, infants will produce more non-socially-directed vocalizations and  
136 fewer socially-directed vocalizations, across two circumstances where parents are:
  - 137 a. instructed to interact with the infant (*Interactive*), and
  - 138 b. engaged in an interview with another adult (*Non-Interactive*).

## 139 2 Methods

### 140 2.1 Part 1: Opinion survey on the function of infant vocalizations

141 We collected survey data using Amazon Mechanical Turk (“mTurk”) to provide a standard of  
142 comparison for the observational data, and a confirmation of the suspicion that not only  
143 researchers in child development, but also the general public have the impression that infants  
144 predominantly vocalize socially. mTurk is increasingly used as an online recruitment tool for  
145 participation in experimental studies and academic surveys as a quick method to obtain many  
146 responses from the general public. mTurk has been shown to be slightly more representative of  
147 the US population than of other countries and is considered to be as reliable as traditional survey

## SOCIAL AND NON-SOCIAL FUNCTIONS OF INFANT VOCALIZATIONS

148 methods (38–40). mTurk qualifications used for this study included: 1) having a HIT Approval  
149 Rate greater than 95% and 2) at least 50 Approved HITs. Qualifications are regularly used by  
150 mTurk requesters to safeguard against inaccurate and inattentive workers.

### 151 **2.1.1 Survey instructions**

152 After providing consent, participants were presented the following instructions for the survey:

153 *This is a study evaluating your perception of how often babies make different kinds of sounds*  
154 *and why they make them. You will be asked to consider sounds produced by babies at three*  
155 *different ages: Infants who are 3-months, 6-months, and 10-months old. Across any given day,*  
156 *consider all the sounds (or "vocalizations") babies make. Your task is to estimate the percentage*  
157 *of how many of these sounds serve a particular function (social or non-social). In answering the*  
158 *questions, consider your previous experiences (if any) around babies and give an intuitive guess*  
159 *for each question. When thinking about your responses, only consider babies who are typically*  
160 *developing, not those who may have special conditions causing atypical development. You are*  
161 *not expected to be an expert on this, and there are no wrong answers. You will be asked to give*  
162 *an intuitive response. Your responses will be required to sum to 100 (e.g., 100%).*

163 During the survey, participants indicated how often they thought infant vocalizations are  
164 1) directed towards another person (socially directed) and 2) NOT directed towards another  
165 person (non-socially directed). Participants answered this question three times with respect to the  
166 three ages (3-month-olds, 6-month-olds, and 10-month-olds). Means and standard deviations of  
167 these responses were calculated to provide an estimate of general opinions about how often  
168 infants use non-socially directed and socially-directed protophones across the three ages.



## SOCIAL AND NON-SOCIAL FUNCTIONS OF INFANT VOCALIZATIONS

### 169 2.1.2 Survey participants

170 300 participants completed the online survey, and 239 participants' data were used in final  
171 analysis for this study based on correct responses to three attention checks distributed throughout  
172 the survey. The attention checks ensured that the responders were not robots and that the  
173 responders were sufficiently knowledgeable in English to have understood the questions clearly.  
174 Detailed demographics of the mTurk survey participants are presented in **Table 1**.

175 **Table 1. mTurk survey participant demographics.**

| Age   |     | Gender |     | Education                    |     | Number of children |     | Frequency around children |    |
|-------|-----|--------|-----|------------------------------|-----|--------------------|-----|---------------------------|----|
| 18-21 | 3   | Male   | 139 | Less than HS                 | 2   | None               | 124 | Never                     | 29 |
| 21-34 | 126 | Female | 97  | HS/GED                       | 29  | 1                  | 41  | Rarely                    | 83 |
| 35-44 | 50  | Other  | 3   | Some college                 | 48  | 2                  | 41  | Sometimes                 | 62 |
| 45-54 | 34  |        |     | Associate's                  | 33  | 3                  | 21  | All the time              | 19 |
| 55-64 | 24  |        |     | Bachelor's                   | 111 | 4+                 | 12  | Frequently                | 46 |
| 65+   | 2   |        |     | Master's                     | 9   |                    |     |                           |    |
|       |     |        |     | Doctorate (PhD)              | 2   |                    |     |                           |    |
|       |     |        |     | Professional Degree (JD, MD) | 5   |                    |     |                           |    |

### 176 2.2 Part 2: Observational study on the function of infant vocalizations

#### 177 2.2.1 Data source

178 Approval for the longitudinal research that produced data for this study was obtained from the  
179 IRB of the University of Memphis. Families were recruited from child-birth education classes  
180 and by word of mouth to parents or prospective parents of newborn infants. Interested families  
181 completed a detailed informed consent indicating their interest and willingness to participate in a  
182 longitudinal study on infant sounds and parent-child interaction.

## SOCIAL AND NON-SOCIAL FUNCTIONS OF INFANT VOCALIZATIONS

183 To obtain samples of infant vocalizations, we drew from the University of Memphis Infant  
 184 Vocalization (IVOC) Laboratory’s archives of audiovisual recordings. We selected six parent-  
 185 infant dyads (3 male, 3 female infants) who were previously recorded while engaged in  
 186 naturalistic interactions and play. All families lived in and around Memphis, Tennessee, and all  
 187 but one infant were exposed to an English-only speaking environment (Infant 6 was exposed to  
 188 English and Ukrainian at home). Parents were asked to speak English and no other language  
 189 during the laboratory recordings. Criteria for inclusion of infant participants included a lack of  
 190 impairments of hearing, vision, language, or other developmental disorders. Demographics and  
 191 recording ages for each infant at each recording session are provided in **Table 2**.

192 **Table 2. Infant demographics.**

| Infant                          | Gender | Birth order | Maternal education   | Ethnicity | Home language      | Age of recordings (months; weeks) |     |                 |     |                  |      |
|---------------------------------|--------|-------------|----------------------|-----------|--------------------|-----------------------------------|-----|-----------------|-----|------------------|------|
|                                 |        |             |                      |           |                    | 1                                 | 2   | 3               | 4   | 5                | 6    |
| 1                               | F      | 1           | PhD                  | White     | English            | 3;1                               | 3;1 | 6;0             | 6;3 | 9;4              | 9;4  |
| 2                               | M      | 3           | Some college         | White     | English            | 3;2                               | 3;2 | 6;0             | 6;3 | 9;3              | 9;3  |
| 3                               | M      | 2           | BA                   | White     | English            | 4;2                               | 4;2 | 6;0             | 7;3 | 11;2             | 11;2 |
| 4                               | F      | 1           | Some graduate school | White     | English            | 4;0                               | 4;1 | 6;0             | 7;1 | 11;3             | 11;3 |
| 5                               | M      | 3           | Some college         | White     | English            | 3;2                               | 3;2 | 5;0             | 6;0 | 10;0             | 10;0 |
| 6                               | F      | 1           | PhD                  | White     | English, Ukrainian | 3;0                               | 3;0 | 5;0             | 6;0 | 10;1             | 10;1 |
| <b>Nominal age of recording</b> |        |             |                      |           |                    | <b>3 months</b>                   |     | <b>6 months</b> |     | <b>10 months</b> |      |

193 *All infants completed two recording sessions around ages 3, 6, and 10 months of age.*

## SOCIAL AND NON-SOCIAL FUNCTIONS OF INFANT VOCALIZATIONS

### 194 **2.2.2 Laboratory recordings**

195 Two laboratory recordings were selected from each of the 6 infants at approximately 3, 6, and 10  
196 months, for a total of 36 sessions. The average session length was 19 minutes (range: 12-22  
197 minutes). During recordings, the parent-infant pairs occupied a studio designed as a child play  
198 room with toys and books. In roughly counterbalanced orders across ages, parents were either  
199 instructed to interact with the infant (*Interactive* circumstance) or with another adult while the  
200 baby was in the room (*Non-Interactive* circumstance). Later at the same age (usually on the same  
201 day), the parent was engaged in the other circumstance. Laboratory staff operated four or eight  
202 pan-tilt video cameras located in the corners of the recording studio from an adjacent control  
203 room—there were three such recording laboratories at varying stages of the research. In all the  
204 laboratories, two channels of video were selected at each moment in time with the goal of  
205 recording: 1) a full view of the interaction or potential interaction, including the infant and any  
206 potential interactors (i.e., parent or laboratory staff) with one camera and 2) a close view of the  
207 infant's face with the other camera. Both the parent and the infant wore high fidelity wireless  
208 microphones, with the infant microphone <10 cm from the infant's mouth. Detailed descriptive  
209 information regarding the recording equipment can be found in previous studies from this  
210 laboratory (41,42).

### 211 **2.2.3 Coding for *Interactive* and *Non-Interactive* circumstances**

212 The recordings had been intended to be differentiated neatly as primarily corresponding to  
213 *Interactive* or *Non-Interactive* circumstances, but the infants often sought attention from the  
214 parents during sessions designated as being *Non-Interactive*, or adults would engage in  
215 conversation during sessions intended to be *Interactive*. For this reason, we categorized segments

## SOCIAL AND NON-SOCIAL FUNCTIONS OF INFANT VOCALIZATIONS

216 of time within each session as *Interactive* or *Non-Interactive* (often sessions included several  
 217 *Interactive* or *Non-Interactive* segments of time). These segments were then collated into a single  
 218 circumstance at each age for each infant to ensure all segments of the recordings were accurately  
 219 portrayed for analysis of the vocalization data. The amount of time pertaining to each varied  
 220 substantially, including two segments that included so few utterances (< 5) we did not include  
 221 them in the analyses (see **Table 3**).

222 **Table 3. Circumstance duration and protophone counts.**

| Infant         | Circumstance    | Number of Protophones |              |              | Duration (Mins) |           |           |
|----------------|-----------------|-----------------------|--------------|--------------|-----------------|-----------|-----------|
|                |                 | 3 mo                  | 6 mo         | 10 mo        | 3 mo            | 6 mo      | 10 mo     |
| 1              | Interactive     | 446                   | 310          | 182          | 53              | 56        | 34        |
|                | Non-Interactive | 4*                    | 47           | 118          | 3               | 7         | 31        |
| 2              | Interactive     | 230                   | 181          | 108          | 33              | 33        | 33        |
|                | Non-Interactive | 202                   | 122          | 70           | 34              | 35        | 20        |
| 3              | Interactive     | 311                   | 158          | 133          | 35              | 34        | 33        |
|                | Non-Interactive | 163                   | 102          | 81           | 36              | 34        | 17        |
| 4              | Interactive     | 273                   | 103          | 233          | 38              | 17        | 40        |
|                | Non-Interactive | 227                   | 384          | 138          | 26              | 42        | 25        |
| 5              | Interactive     | 328                   | 330          | 89           | 27              | 34        | 34        |
|                | Non-Interactive | 257                   | 147          | 117          | 33              | 31        | 32        |
| 6              | Interactive     | 442                   | 381          | 116          | 60              | 43        | 42        |
|                | Non-Interactive | 13                    | 4*           | 107          | 2               | 1         | 22        |
| <b>Average</b> |                 | <b>241.3</b>          | <b>189.1</b> | <b>124.3</b> | <b>32</b>       | <b>31</b> | <b>30</b> |

223 *Total duration and counts of the number of protophones for Interactive and Non-Interactive*  
 224 *circumstance segments at each age for all infants. Segments marked with an asterisk (\*) were*  
 225 *excluded from analysis because they included fewer than 5 protophones.*

226

### 227 **2.2.4 Coding of the sociality of the infant protophones**

228 Coding for circumstance, illocutionary functions, and gaze direction was completed within the  
 229 Action Analysis Coding and Training software (AACT) (43). This coding software has been  
 230 used and discussed extensively in previous research from this laboratory (42,44,45). The

## SOCIAL AND NON-SOCIAL FUNCTIONS OF INFANT VOCALIZATIONS

231 software affords frame-accurate coordination of video and audio, which is displayed in a special  
232 version of the TF32 software (46). TF32 includes both flexible waveform and spectrographic  
233 displays. Coders can view and listen with a scrolling audio display where a cursor indicates the  
234 location of the audio at each moment of playback.

235 The utterances to be coded in the present work had been labeled for vocal type and bounded in  
236 time for onsets and offsets in AACT in prior studies (34). The AACT software allowed the coder  
237 to advance to each bounded utterance in turn for playback and coding in illocutionary force and  
238 gaze direction for the present study. The AACT software also allows users to export data that  
239 indicate whether an utterance was coded within an *Interactive* or *Non-Interactive* circumstance.

240 All infant protophones that had been previously bounded were also labeled for the present work  
241 in terms of illocutionary force (47–49) to indicate potentially communicative functions, which  
242 could be easily collapsed into the two **socially directed** and **non-socially-directed** categories.  
243 Illocutionary force was originally defined by Austin as the social intention of a speech act, but  
244 has been extended in work in child development and animal communication to also describe  
245 vocal acts produced with little or no social intention (34). In this extended usage, vocal play, for  
246 example, is treated as an illocutionary force. A fussy protophone, not directed toward anyone,  
247 can be treated as having the illocutionary force of complaint.

248 Pre-linguistic infants express varying illocutionary forces and varying emotional content (i.e.,  
249 positive, neutral, and negative) in early protophones beginning at birth (34,50). This fact  
250 indicates that infants have the capacity to produce a single protophone type with different  
251 illocutionary forces on different occasions, indicating they possess a vocal capability that is, of  
252 course, required of all words and sentences in mature language. Put another way, infant

## SOCIAL AND NON-SOCIAL FUNCTIONS OF INFANT VOCALIZATIONS

253 protophones can be used with varying communicative intentions, for example, to gain attention,  
254 to continue vocal interaction when engaged with a caregiver, or to make a request. The same  
255 vocalization types can also be produced for the infant's own purposes when not engaged in  
256 social interaction at all, e.g., when vocalizing toward an object or when simply exploring sound  
257 for its own sake.

258 In our coding of the social or non-social illocutionary functions of infant sounds, we attended to  
259 all the contextual information that appeared to be relevant to the judgment of sociality (e.g., gaze  
260 direction, gesture, timing with respect to utterances of other speakers, etc.). Our coding is  
261 founded on the assumption that human observers are naturally able to judge the extent to which  
262 vocalizations at any age are intended as social acts—otherwise how would humans know when  
263 to respond or participate in vocal engagement? If some parents cannot make such judgments,  
264 they are surely at a severe disadvantage in child rearing, because they don't know when their  
265 infants are communicating or not. It makes sense that natural selection has produced parents (and  
266 potential parents) that are capable of recognizing when their infants are communicating  
267 intentionally and when not. Consequently, the coding process takes advantage of natural  
268 capabilities of human observers and gauges the extent of their reliability by comparing  
269 agreement among observers.

270 **Non-socially directed** protophones were identified as utterances infants produced for their own  
271 purposes; such events included vocal play, object-directed sounds, vocal complaints and  
272 exultations not directed toward another person, or other protophones produced with no obvious  
273 intention or social directivity. Protophones were labeled as **socially directed** when for example  
274 the infant used them to initiate conversation, continue an ongoing interaction, imitate another

## SOCIAL AND NON-SOCIAL FUNCTIONS OF INFANT VOCALIZATIONS

275 person, or to complain or exult in a way that was directed to an adult as indicated by gaze,  
276 gestures, or other contextual factors.

277 During the coding of sociality, both the primary coder and an independent reliability coder took a  
278 broad view of each utterance and its context of production. That is, each time a protophone was  
279 located in AACT, the cursors were always stretched so that, during playback before coding for  
280 illocutionary force, the coder saw and heard the utterance plus a several-second context both  
281 before and after it. If there was ambiguity about how to judge the possible social directivity of  
282 the utterance, the boundaries were stretched further until the coder felt confident that no further  
283 stretching would improve the coding decision.

### 284 **2.2.5 Coding for gaze direction of infant protophones**

285 Gaze direction coding was also conducted for all protophones. For this coding, sound was turned  
286 off, and the coder determined whether at any time during the vocalization, the infant looked  
287 toward another person. The time frame of playback for the protophones was expanded through a  
288 special setting in AACT by 50ms before and 50ms after the actual utterance boundaries as  
289 indicated based on the original protophone coding. This expansion of time frame for viewing  
290 was deemed important because of the low frame rate of video recording (~30ms per frame) and  
291 ensured that the entire period of the vocalization was available for visual judgment. For  
292 utterances that included no good camera view of the infant (the infant sometimes turned away  
293 from the cameras) or for utterances where the infant's eyes were closed, the coder indicated  
294 "can't see" or "eyes closed," respectively. The gaze direction analysis excluded all such  
295 utterances.

## **SOCIAL AND NON-SOCIAL FUNCTIONS OF INFANT VOCALIZATIONS**

### **296 2.2.6 Coder training and coder agreement**

297 For the coding in the present study, both the primary coder and the agreement coder were trained  
298 in infant vocalizations and illocutionary coding by the last two authors in a sequence that has  
299 been described in several prior publications (32,34,45). In brief, the training included 1) a series  
300 of 5 lectures on vocal development and coding of early vocalization and interaction, 2) an  
301 interleaved set of corresponding coding exercises using recorded data like that to be encountered  
302 in the current research; 3) comparisons of the outcomes of those coding exercises with regard to  
303 outcomes for other coders, with special reference to coder agreement and agreement with gold  
304 standard coding by the last author, who has been engaged in vocal development research for  
305 more than 40 years (51); and 4) a certification process that resulted from reviews ensuring that  
306 coding results correlated highly with group coding and the gold standard coding and did not  
307 diverge from gold standard coding by more than 10% of mean values.

308 All the data of the present study were coded for illocutionary force (from which socially- and  
309 non-socially-directed categories could be derived) by the first author, and approximately 30% of  
310 the total data set was coded independently for illocutionary force by the agreement coder. An  
311 original coding of gaze direction had been done on three of the six infants by a previous team of  
312 coders for the paper previously cited (34). This completely independent prior coding on half of  
313 the data for the present study was available to offer an agreement check on the coding done for  
314 the present paper.

## **315 3 Results**

### **316 3.1 Part 1: Opinion survey on the function of infant speech-like vocalizations**



## SOCIAL AND NON-SOCIAL FUNCTIONS OF INFANT VOCALIZATIONS

317 **Fig. 1** shows the survey participants' distribution of responses on relative percentages of  
318 protophones across the three ages. On average across the three ages, the respondents thought  
319 approximately 43% of infant protophones were non-socially directed. In addition, they thought  
320 infants produce fewer non-social vocalizations at the end of the first year (36%) than at the  
321 beginning (50%). Thus, the respondents believed more than half of infant protophones are  
322 socially directed and many more than half by 10 months.

323 Furthermore, both parents and non-parents reported similar percentages of social and non-social  
324 functions. Overall, parents reported infants used social protophones 58% of the time, whereas  
325 non-parents reported 57%. Males and females also estimated very similar percentages of social  
326 protophones (58 and 57% respectively). Persons who self-identified as being around kids "all the  
327 time" estimated that infants produce 58% social protophones, while those who self-identified as  
328 never being around kids estimated 55%. For all these comparisons (parents v. non-parents, males  
329 v. females, always around kids v. never around kids), the estimated percentage of social  
330 protophones was higher at 6 than 3 months and higher at 10 than 6 months.

331 **Fig. 1. mTurk opinion study on social directivity of infant protophones across 3 ages.**

332 *[Fig. 1]*

333 *Opinions of the survey participants on how often infants use protophones socially and non-*  
334 *socially. Participants believed infants decrease the percentage of non-socially directed*  
335 *protophones between 3-10 months, from 50% at the youngest age to 36% by the oldest age.*

336 **3.2 Part 2: Observational study on the function of infant vocalizations**

## SOCIAL AND NON-SOCIAL FUNCTIONS OF INFANT VOCALIZATIONS

### 337 3.2.1 Protophone usage judged in terms of illocutionary functions

338 A total of 6,657 infant protophones were labeled across all 36 recordings (6 infants x 3 ages x 2  
339 circumstances). The data account for all infant utterances that were judged to be non-vegetative  
340 (burp, hiccup) and not fixed signals (cry, laugh) across the 36 laboratory recording sessions.  
341 Two segments were eliminated from analysis because of a very low number of protophones for  
342 that infant at that age in that condition (specifically, Infant 1, *Non-Interactive* at 3 months and  
343 Infant 6, *Interactive* at 6 months, see **Table 3**). Only 8 protophones occurred in these 2  
344 segments, so the resulting 34 segments provided 6,649 protophones.

345 To determine if the usage of non-socially directed protophones exceeded that of socially-directed  
346 protophones, we used *t*-tests comparing percentages of non-socially-directed protophones against  
347 50% and against the percentages of socially-directed protophones as estimated based on the  
348 survey. To test for effects of Age (3 levels) and recording Circumstance (*Interactive* vs. *Non-*  
349 *Interactive*), a different approach was required. We selected a logistic regression model based on  
350 Generalized Estimating Equations (GEE). GEE analyses are a non-parametric alternative to  
351 generalized linear mixed models that accounts for within-subject covariance when estimating  
352 population-averaged model parameters (52).

353 **Fig. 2** displays the overall percentages of protophones produced by the six infants across the two  
354 broad illocutionary groupings of non-socially directed and socially directed. Infants used  
355 significantly more non-socially-directed protophones across the three ages than socially-directed  
356 protophones, with about 75% of all protophones being non-socially directed. By *t*-tests of the  
357 percentage of non-socially directed protophones, it was found they significantly ( $p < .001$ )  
358 exceeded 50% at all three ages and also significantly ( $p < .001$ ) exceeded the percentage of

## SOCIAL AND NON-SOCIAL FUNCTIONS OF INFANT VOCALIZATIONS

359 socially-directed protophones estimated by the survey participants at all three ages. **Fig. 2**  
360 suggests no notable change in the predominance of the non-socially directed protophones across  
361 Age, and indeed the GEE revealed no significant difference in the percentage of protophones that  
362 were socially-directed across Age ( $p = 0.48$ ).

363 **Fig. 2. Social directivity of infant protophones across 3 ages.**

364 *[Fig. 2]*

365 *Percentage of non-socially directed and socially-directed infant protophones across all*  
366 *observations. Overall, infants primarily produced non-social protophones (75%), suggesting that*  
367 *the great majority of infant sounds are produced endogenously in the first year. Furthermore, a*  
368 *non-significant main effect of Age is consistent with an interpretation of relatively stable use of*  
369 *both social and non-social functions across the three ages compared to the mTurk opinion study*  
370 *results.*

371 Similarly, *t*-tests of the proportion of non-socially-directed protophones in the two circumstances  
372 (*Interactive* vs. *Non-Interactive*, see **Fig. 3**) showed that non-social protophones significantly  
373 exceeded 50% in both circumstances ( $p < .001$ ). Based on the GEE, infants used significantly  
374 more non-socially-directed protophones in the *Non-Interactive* circumstance than the *Interactive*  
375 circumstance ( $p < .03$ ), as illustrated in **Fig. 3**. A separate GEE analysis in which only main  
376 effects were considered revealed a stronger Circumstance effect ( $p < .0001$ ).

377 **Fig. 3. Social directivity of infant protophones across two circumstances.**

378 *[Fig. 3]*

## SOCIAL AND NON-SOCIAL FUNCTIONS OF INFANT VOCALIZATIONS

379 *Percentages of social and non-social infant protophones across Interactive and Non-Interactive*  
380 *circumstances. Non-socially-directed protophones predominated in both conditions.*

381 The pattern of results revealed by the illocutionary coding was similar for both the primary coder  
382 and the reliability coder, with 79% point to point inter-rater agreement on 30% of the recordings.  
383 For both coders, non-socially-directed protophones predominated, and in fact the reliability  
384 coder—who had no knowledge of the hypotheses for this study— showed a slightly higher  
385 proportion of non-socially-directed protophones (79.2%) than the primary coder (78.5%).

### 386 **3.2.2 Protophone usage based on gaze-direction judgments**

387 As a check on the illocutionary coding, we considered an alternate, simpler way of determining  
388 social directivity of infant protophones. The first author coded gaze direction during the  
389 protophone production as being directed or not directed toward a person. Gaze judgments were  
390 made with sound off (video only) for all six infants.

391 In the earlier study mentioned above (34), 50% of the current sample had been coded for gaze  
392 direction, allowing for a robust analysis of independent inter-rater agreement. Inter-rater  
393 agreement on a point-to-point basis was 87% (of 3347 utterances). The results showed a strong  
394 predominance of protophones not being associated with gaze directed toward another person for  
395 both the earlier coders and the present one. Based on the same sample of utterances, the primary  
396 coder in this study found 64% of the utterances not to include person-directed gaze, while the  
397 previous (reliability) coder found 61% not to include person-directed gaze. These percentages  
398 represent only half the total sample (three of the six infants) and consisted heavily of the  
399 *Interactive* circumstance; consequently, the percentages (64 and 61%) are lower than the 72% of  
400 utterances deemed not to include person-directed gaze for the whole sample as reported above.

## SOCIAL AND NON-SOCIAL FUNCTIONS OF INFANT VOCALIZATIONS

401 Let us expand on why the gaze-direction and illocutionary coding methods do not yield exactly  
402 the same outcomes on social directivity. In the coding of illocutionary force, momentary gaze  
403 direction by the infant toward a person was sometimes not deemed to indicate social  
404 directedness. For example, a momentary glance directed to the parent occasionally occurred even  
405 though the infant appeared to be engaged in vocal play. There were also a number of cases where  
406 the coder deemed a protophone to be socially-directed in illocutionary coding, even though gaze  
407 direction toward a person was deemed absent. Such cases often corresponded to interactional  
408 sequences where the relative timing of utterances suggested the infant was engaged and directing  
409 the protophone to the parent, even though the infant was looking away.

410 Even though social directedness as determined by gaze-direction did not correspond for as many  
411 individual protophones as the illocutionary judgments of social directedness, the overall  
412 percentages of non-socially-directed protophones was notably similar for both methods. That is,  
413 the great majority of infant protophones were judged to be produced with gaze directed  
414 somewhere other than towards any person in the room, just as the illocutionary judgments found  
415 the great majority of infant protophones to be non-socially directed. 72% of the infant  
416 protophones were deemed not to include person-directed gaze, and 75% were deemed non-  
417 socially directed by illocutionary coding.

### 418 **4 Discussion**

419 Overall, infants used about three times as many non-socially-directed protophones as socially-  
420 directed ones. This predominance remained stable across the three ages. Furthermore, even in the  
421 *Interactive* circumstance, where parents had been instructed to engage with their infants, non-  
422 socially-directed protophones predominated, with twice as many non-socially directed as

## SOCIAL AND NON-SOCIAL FUNCTIONS OF INFANT VOCALIZATIONS

423 socially-directed ones. In the *Non-Interactive* circumstance, where parents were engaged in  
424 conversation with laboratory staff, the non-socially-directed protophones predominated to a  
425 substantially greater extent, with four times as many non-socially directed as socially directed.

426 The low rate of vocal directivity of the infants in the first 10 months as reported here requires a  
427 re-orientation of thinking about the functions of infant protophones. It seems important to draw  
428 attention to the fact that all the sessions of recording reported on here were ones where caregiver  
429 and infant were in the same room, and where caregivers were aware that they were being  
430 recorded. The caregivers also knew that the study was about vocal development, and it was  
431 assumed they would endeavor to elicit infant vocalization and thus interaction as much as  
432 possible. They also often attended to infant vocalizations even in the designated *Non-Interactive*  
433 circumstances, sometimes responding to infant protophones with infant-directed speech (IDS), a  
434 pattern of caregiver responsivity that required some restructuring of our analysis to assign  
435 segments of the sessions appropriately to the *Interactive* and *Non-Interactive* circumstances.

436 Consequently, we presume parents tried to maximize their infants' socially-directed  
437 vocalization— and yet the rate was low.

438 Partly because the *Non-Interactive* circumstance resulted in a considerably larger predominance  
439 of the non-socially-directed protophones, we are suspicious that even more naturalistic  
440 recordings might produce an even greater predominance of non-socially-directed protophones.

441 That is, we suspect that the percentage of infant protophones that are socially directed in the  
442 natural environment of the home could be considerably *lower* than the values estimated here.

443 The suspicion is supported by recent results where we had the opportunity to compare the  
444 amount of IDS occurring in laboratory recordings for 12 infants (three of whom are among those

## SOCIAL AND NON-SOCIAL FUNCTIONS OF INFANT VOCALIZATIONS

445 represented in the present work) to the amount of IDS occurring in all-day LENA recordings  
446 (53) conducted in the home with the very same infants at approximately the same ages across the  
447 first year of life (32). IDS was six times more frequent in the laboratory recordings than in  
448 randomly-selected five-minute samples from the all-day recordings when infants were awake.  
449 Thus, we reason that the percentage of non-socially-directed protophones at home could be  
450 considerably higher than we have seen in the present work, since IDS is considerably lower, a  
451 possibility that will be explored in subsequent efforts from our group. In future research, we also  
452 aim to study a larger sample of infants and to consider more differentiated circumstances of  
453 recording.

454 Our results clearly contradict the apparent standard viewpoint in the field of child development,  
455 where infant vocalizations are generally treated as responses to adult utterances or as attempts to  
456 engage adults in social interaction. The survey data suggest the general public shares this  
457 expectation with the field of child development, assuming babies use protophones for more  
458 social purposes than non-social ones.

459 What is the source of the mistaken impression that non-socially-directed protophones occur far  
460 less often than they actually do? It seems likely that the answer lies in the amount of attention  
461 given by caregivers to infant vocalizations that are directed toward them as opposed to those that  
462 are not. We assume parents and other caregivers notice and remember interactive vocalizations  
463 to a greater extent than non-interactive ones. Furthermore, parents may attend to any unique type  
464 of spontaneously produced protophone—irrespective of the communicative intent—and adapt  
465 their behavior to promote continued production of this particular sound, creating the appearance  
466 of, or perhaps initiating social engagements with the infant. Indeed, we have reported evidence

## SOCIAL AND NON-SOCIAL FUNCTIONS OF INFANT VOCALIZATIONS

467 suggesting caregivers pay the greatest attention to salient vocal signals such as those occurring in  
468 imitation, which is surprisingly rare in the first year (54). Caregivers, and thus people in general,  
469 may be inclined to overestimate the proportion of salient vocal signals such as imitation or  
470 immediate responses since it seems likely these are the sounds to which parents attend most. So  
471 when they render estimates, they tend to overstate the frequency of occurrence of the socially-  
472 directed ones. It is only with systematic counting of every vocalization occurring in recorded  
473 samples, as has been done in the present work, that it becomes possible to determine that the  
474 great majority of infant protophones are in fact directed to nobody.

475 The results strongly suggest, then, that babies vocalize predominantly for their own endogenous  
476 purposes, hundreds or even thousands of times daily — 4-5 times per minute based on randomly  
477 sampled segments from all-day recordings at home (32). There is considerable evidence that not  
478 just in vocalization, but in other realms as well, babies are not passive learners and in fact  
479 regularly influence their own experiences (55). The question that requires answering based on  
480 the present work is: If protophones are not directed to caregivers, what is their purpose from a  
481 developmental or an evolutionary standpoint? What advantage could be associated with  
482 producing vocal sounds that are largely affectively neutral, produced most commonly in apparent  
483 comfort, but without social directivity (34,50)?

484 Members of our research group and John L. Locke have argued elsewhere (48,56–58) from an  
485 evolutionary-developmental (evo-devo) perspective (59–62) that high rates of exploratory  
486 vocalization and vocal play may constitute fitness signals by the human infant. The idea is based  
487 on the fact that the human infant is altricial (born relatively helpless) and has a long road ahead  
488 of requiring caregiver assistance for survival—human infant need for such caregiving lasts



## SOCIAL AND NON-SOCIAL FUNCTIONS OF INFANT VOCALIZATIONS

489 literally twice as long as in our closest ape relatives (63). Consequently, we have argued that the  
490 human infant experiences selection pressure on the provision of fitness signals that could have  
491 the effect of eliciting long-term investment from caregivers, whose evolutionary goal can be  
492 portrayed as perpetuation of their own genes through grandchildren. Presumably from this point  
493 of view, caregivers may then invest more in infants who seem healthy and tend to neglect infants  
494 who seem less healthy. Thus, we operate under the assumption that the production of  
495 comfortable vocalization can signal well-being and good health. This pattern of fitness signaling  
496 may well have applied to the ancient hominin infant, who has been presumed in accord with the  
497 hominin “obstetrical dilemma” (64), to have been more altricial than other apes as soon as  
498 humans were bipedal. In accord with this reasoning— which proves surprisingly difficult to  
499 confirm in the fossil record (65,66)— bipedality had narrowed the human pelvis and required the  
500 hominin infant to be born with a smaller head and thus to be more altricial than other apes.

501 One might ask, if fitness signaling is the primary advantage of protophones, why do infants not  
502 endeavor to direct their protophones primarily toward potential caregivers? Of course, some of  
503 the time they do, as indicated by our data. When they do not, the protophones may still be heard  
504 and noticed, if only semi-consciously by potential caregivers. A parent may hear comfortable  
505 infant protophones and draw the unspoken conclusion that the infant is well and needs no  
506 immediate attention. Regular events of noticing the infant’s well-being may reinforce a  
507 caregiver’s commitment to long-term investment precisely because it suggests the infant is  
508 healthy and thus likely to be a good investment for survival and reproduction. So it may pay for  
509 the human infant to produce protophones at prodigious rates, in the case someone might be  
510 listening.

## SOCIAL AND NON-SOCIAL FUNCTIONS OF INFANT VOCALIZATIONS

511 The production of protophones in infancy at the beginning of the communicative split between  
512 ancient hominins and their ape relatives, perhaps millions of years ago, seems likely to have laid  
513 a foundation for a more extensive use of vocalization as a fitness signal later in life, for example,  
514 in mating or in alliance formation (57). And as the amount of protophone-like vocalization  
515 became more well-established in the hominin line, it surely provided a foundation for more  
516 elaborate uses of vocalization, ratcheting from simple fitness signaling toward more and more  
517 language-like uses (48).

518 Play is widely recognized as a theater for practice of the behaviors young mammals will need as  
519 they proceed through life (67,68). But it is important to note that playful behavior can serve not  
520 only as practice, but also as a fitness signal for the altricial young of many species. Our  
521 suggestion is that protophones can be seen (in the substantial majority of cases) as playful  
522 indicators of well-being, but they would seem to contribute at the same time to a sort of  
523 preparation for the future in mating, in alliance formation, and ultimately in the development of  
524 language.

### 525 **5 Acknowledgements**

526 We wish to thank the survey participants, graduate student reliability coders, and the families in  
527 Memphis whose infants participated in this research. The research for this manuscript was  
528 funded by NIH Grants R01 DC006099, DC011027, and DC015108 from the National Institute  
529 on Deafness and Other Communication Disorders and by the Plough Foundation, which supports  
530 Oller's Chair of Excellence.

531

## SOCIAL AND NON-SOCIAL FUNCTIONS OF INFANT VOCALIZATIONS

### 532 6 References

- 533 1. Bigelow AE, Rochat P. Two-month-old infants' sensitivity to social contingency in  
534 mother-infant and stranger-infant interaction. *Infancy*. 2006;9(3):313–25.
- 535 2. Bourvis N, Singer M, Saint Georges C, Bodeau N, Chetouani M, Cohen D, et al. Pre-  
536 linguistic infants employ complex communicative loops to engage mothers in social  
537 exchanges and repair interaction ruptures. *R Soc Open Sci*. 2018;5.
- 538 3. Fonagy P. *Affect regulation, mentalization and the development of the self*. Routledge;  
539 2018.
- 540 4. Liszkowski U. Two sources of meaning in infant communication: Preceding action  
541 contexts and act-accompanying characteristics. *Philos Trans R Soc Lond B Biol Sci*.  
542 2014;369(1651):20130294.
- 543 5. Watson JS. Memory and “contingency analysis” in infant learning. *Merrill Palmer Q*  
544 *Behav Dev*. 1967;13(1):55–76.
- 545 6. Winnicott DW. The theory of the parent-infant relationship. *Int J Psychoanal*.  
546 1960;41:585–95.
- 547 7. Oller DK. *The emergence of the speech capacity*. Mahwah, NJ: Psychology Press; 2000.
- 548 8. Goldstein MH, Schwade JA. Social feedback to infants' babbling facilitates rapid  
549 phonological learning. *Psychol Sci*. 2008 May 1;19(5):515–23.
- 550 9. Gratier M, Devouche E, Guellai B, Infanti R, Yilmaz E, Parlato-Oliveira E. Early

## SOCIAL AND NON-SOCIAL FUNCTIONS OF INFANT VOCALIZATIONS

- 551 development of turn-taking in vocal interaction between mothers and infants. *Front*  
552 *Psychol.* 2015;6(September):1–10.
- 553 10. Hsu HC, Fogel A. Infant vocal development in a dynamic mother-infant communication  
554 system. *Infancy.* 2001;2(1):87–109.
- 555 11. Bloom K, Esposito A. Social conditioning and its proper control procedures. *J Exp Child*  
556 *Psychol.* 1975;
- 557 12. Routh DK. Conditioning of vocal response differentiation in infants. *Dev Psychol.*  
558 1969;1(3):219–26.
- 559 13. Weisberg P. Social and non-social conditioning of infant vocalization. *Child Dev.*  
560 1963;34:377–88.
- 561 14. Abney DH, Warlaumont AS, Oller DK, Wallot S, Kello CT. Multiple coordination  
562 patterns in infant and adult vocalization. *Infancy.* 2017;22(4):514–39.
- 563 15. Gros-Louis J, West MJ, King AP. Maternal responsiveness and the development of  
564 directed vocalizing in social interactions. *Infancy.* 2014;19(4):385–408.
- 565 16. Hsu HC, Fogel A. Social regulatory effects of infant nondistress vocalization on maternal  
566 behavior. *Dev Psychol.* 2003;39(6):976.
- 567 17. Warlaumont AS, Richards JA, Gilkerson J, Oller DK. A social feedback loop for speech  
568 development and its reduction in autism. *Psychol Sci.* 2014;25:1314–24.
- 569 18. Tronick EZ, Als H, Adamson LB, Wise S, Brazelton TB. The infant's response to

## SOCIAL AND NON-SOCIAL FUNCTIONS OF INFANT VOCALIZATIONS

- 570 entrapment between contradictory messages in face-to-face interaction. *J Am Acad Child*  
571 *Psychiatry*. 1978;17:1–13.
- 572 19. Goldstein MH, King AP, West MJ. Social interaction shapes babbling: testing parallels  
573 between birdsong and speech. *Proc Natl Acad Sci USA*. 2003 Jun;100(13):8030–5.
- 574 20. Franklin B, Warlaumont AS, Messinger D, Bene E, Nathani Iyer S, Lee C-C, et al. Effects  
575 of parental interaction on infant vocalization rate, variability and vocal type. *Lang Learn*  
576 *Dev*. 2013;10(3):279–96.
- 577 21. Ainsworth MD. Object relations, dependency, and attachment: A theoretical review of the  
578 infant-mother relationship. *Child Dev*. 1969;969–1025.
- 579 22. Bowlby J. *Attachment and loss*. Vol. 1. New York, NY: Basic Books; 1969.
- 580 23. Pipp S, Harmon RJ. Attachment as regulation: A commentary. *Child Dev*.  
581 1987;58(3):648–52.
- 582 24. Schore AN. Effects of a secure attachment relationship on right brain development, affect  
583 regulation, and infant mental health. *Infant Ment Health J*. 2001;22(1–2):7–66.
- 584 25. Skinner BF. *Verbal behavior*. New York, NY: Appleton-Century-Crofts, Inc.; 1957.
- 585 26. Watson JB. Psychology as the behaviorist views it. *Psychol Rev*. 1913;20(2):158–77.
- 586 27. Davis K, Panksepp J. *The emotional foundations of personality: A neurobiological and*  
587 *evolutionary approach*. WV Norton & Company; 2018.
- 588 28. Panksepp J. Toward a general psychobiological theory of emotions. *Behav Brain Sci*.

## SOCIAL AND NON-SOCIAL FUNCTIONS OF INFANT VOCALIZATIONS

- 589           1982 Sep 4;5(3):407–22.
- 590   29.   Panksepp J. Toward a cross-species neuroscientific understanding of the affective mind:  
591           Do animals have emotional feelings? Vol. 73, *American Journal of Primatology*. 2011. p.  
592           545–61.
- 593   30.   Panksepp J, Biven L. *The archaeology of mind: Neuroevolutionary origins of human*  
594           emotions. WV Norton & Company; 2012.
- 595   31.   Moulin-Frier C, Nguyen SM, Oudeyer PY. Self-organization of early vocal development  
596           in infants and machines: The role of intrinsic motivation. *Front Psychol*. 2014;4:1006.
- 597   32.   Oller DK, Griebel U, Iyer SN, Jhang Y, Warlaumont AS, Dale R, et al. Language origins  
598           viewed in spontaneous and interactive vocal rates of human and bonobo infants. *Front*  
599           *Psychol*. 2019;10:729.
- 600   33.   Moulin-Frier C, Oudeyer PY. The role of intrinsic motivations in learning sensorimotor  
601           vocal mappings: A developmental robotics study. In: *INTERSPEECH, ISCA*. Lyon,  
602           France; 2013.
- 603   34.   Oller DK, Buder EH, Ramsdell HL, Warlaumont AS, Chorna LB, Bakeman R. Functional  
604           flexibility of infant vocalization and the emergence of language. *Proc Natl Acad Sci*.  
605           2013;110(16):6318–23.
- 606   35.   Harold MP, Barlow SM. Effects of environmental stimulation on infant vocalizations and  
607           orofacial dynamics at the onset of canonical babbling. *Infant Behav Dev*. 2013;36(1):84–  
608           93.

## SOCIAL AND NON-SOCIAL FUNCTIONS OF INFANT VOCALIZATIONS

- 609 36. Iyer SN, Denson H, Lazar N, Oller DK. Volubility of the human infant: Effects of parental  
610 interaction (or lack of it). *Clin Linguist Phonetics*. 2016;30(6):470–788.
- 611 37. Oller DK, Caskey M, Yoo H, Bene E, Jhang Y, Lee CC, et al. Preterm and full term infant  
612 vocalization and the origin of language. *Sci Rep*. 2019;9(14734).
- 613 38. Buhrmester M, Kwang T, Gosling SD. Amazon’s mechanical Turk: A new source of  
614 inexpensive, yet high-quality, data? *Perspect Psychol Sci*. 2011;6(1):3–5.
- 615 39. Paolacci G, Chandler J. Inside the Turk: Understanding mechanical Turk as a participant  
616 pool. *Curr Dir Psychol Sci*. 2014 Jun 3;23(3):184–8.
- 617 40. Hauser DJ, Schwarz N. Attentive Turkers: MTurk participants perform better on online  
618 attention checks than do subject pool participants. *Behav Res Methods*. 2016;48(1):400–7.
- 619 41. Buder E, Warlaumont AS, Oller DK, Chorna LB. Dynamic indicators of mother-infant  
620 prosodic and illocutionary coordination. In: *Speech Prosody 2010-Fifth International*  
621 *Conference*. 2010. p. 6–9.
- 622 42. Warlaumont AS, Oller DK, Dale R, Richards JA, Gilkerson J, Xu D. Vocal interaction  
623 dynamics of children with and without autism. In: *Proceedings of the Annual Meeting of*  
624 *the Cognitive Science Society*. 2010. p. 121–6.
- 625 43. Delgado RE, Buder EH, Oller DK. *AACT (Action Analysis Coding and Training)*. Miami,  
626 FL: Intelligent Hearing Systems; 2010.
- 627 44. Jhang Y, Franklin B, Ramsdell-Hudock HL, Oller DK. Differing roles of the face and  
628 voice in early human communication: Roots of language in multimodal expression. *Front*

## SOCIAL AND NON-SOCIAL FUNCTIONS OF INFANT VOCALIZATIONS

- 629           Commun. 2017;2(10).
- 630   45.   Yoo H, Bowman DA, Oller DK. The origin of protoconversation: An examination of  
631           caregiver responses to cry and speech-like vocalizations. *Front Psychol.* 2018;9:1510.
- 632   46.   Milenkovic P. TF32 [Computer software]. Madison, WI: University of Wisconsin-  
633           Madison; 2001.
- 634   47.   Austin JL. *How to do things with words.* Oxford, UK: Oxford University Press; 1962.
- 635   48.   Oller DK, Griebel U, Warlaumont AS. Vocal development as a guide to modeling the  
636           evolution of language. *Top Cogn Sci.* 2016;8(2):382–92.
- 637   49.   Searle JR. *Speech acts: An essay in the philosophy of language.* Vol. 626. Cambridge  
638           University; 1969.
- 639   50.   Jhang Y, Oller DK. Emergence of functional flexibility in infant vocalizations of the first  
640           3 months. *Front Psychol.* 2017;8:300.
- 641   51.   Oller DK, Wieman LA, Doyle J, Ross C. Infant babbling and speech. *J Child Lang.*  
642           1976;3:1–11.
- 643   52.   Liang K-Y, Zeger SL. Longitudinal data analysis using generalized linear models. Vol.  
644           73, *Biometrika.* 1986. p. 13–22.
- 645   53.   Zimmerman FJ, Gilkerson J, Richards JA, Christakis DA, Xu D, Gray S, et al. Teaching  
646           by listening: The importance of adult-child conversations to language development.  
647           *Pediatrics.* 2009;124:342–9.



## SOCIAL AND NON-SOCIAL FUNCTIONS OF INFANT VOCALIZATIONS

- 648 54. Long HL, Oller DK, Bowman DA. Reliability of listener judgments of infant vocal  
649 imitation. *Front Psychol.* 2019 Jun 11;10:1340.
- 650 55. Bornstein MH. Infant into conversant: Language and nonlanguage processes in  
651 developing early communication. In: Budwig N, Užgiris IČ, Wertsch J V., editors.  
652 *Communication: An Arena of Development.* Santa Barbara, CA: Greenwood Publishing  
653 Group; 2000. p. 109–29.
- 654 56. Locke JL. Parental selection of vocal behavior. *Hum Nat.* 2006;17(2):155–68.
- 655 57. Locke JL. Evolutionary developmental linguistics: Naturalization of the faculty of  
656 language. *Lang Sci.* 2009;31(1):33–59.
- 657 58. Oller DK, Griebel U. Contextual freedom in human infant vocalization and the evolution  
658 of language. In: Burgess RL, MacDonald K, editors. *Evolutionary Perspectives on Human*  
659 *Development.* Thousand Oaks, CA: SAGE Publications; 2004. p. 135–66.
- 660 59. Carroll SB. *Endless forms most beautiful: The new science of evo devo and the making of*  
661 *the animal kingdom.* WV Norton & Company; 2005.
- 662 60. Gottlieb G. Developmental-behavioral initiation of evolutionary change. *Psychol Rev.*  
663 2002;109(2):211.
- 664 61. Kirschner M, Gerhart J. *The plausibility of life: Resolving Darwin’s dilemma.* Yale  
665 University; 2006.
- 666 62. Newman SA, Müller GB. Epigenetic mechanisms of character origination. *J Exp Zool.*  
667 2000;288(4):304–17.

## SOCIAL AND NON-SOCIAL FUNCTIONS OF INFANT VOCALIZATIONS

- 668 63. Locke JL, Bogin B. Language and life history: A new perspective on the development and  
669 evolution of human language. *Behav Brain Sci.* 2006;29:259–325.
- 670 64. Washburn SL. Tools and human evolution. *Sci Am.* 1960;203(3):62–75.
- 671 65. Gruss LT, Schmitt D. The evolution of the human pelvis: Changing adaptations to  
672 bipedalism, obstetrics and thermoregulation. *Philos Trans R Soc B Biol Sci.*  
673 2015;370(1663):20140063.
- 674 66. Wells JCK, DeSilva JM, Stock JT. The obstetric dilemma: An ancient game of Russian  
675 roulette, or a variable dilemma sensitive to ecology? *Am J Phys Anthropol.* 2012;149:40–  
676 71.
- 677 67. Bekoff M, Byers J. *Animal play: Evolutionary, comparative, and ecological perspectives.*  
678 Vol. 36. Cambridge University; 1998.
- 679 68. Lafreniere P. Evolutionary functions of social play: Life histories, sex differences, and  
680 emotion regulation. *Am J Play.* 2011;3(4):464–88.
- 681

3 months

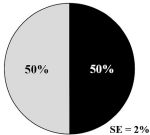

6 months

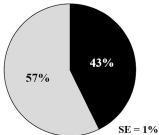

10 months

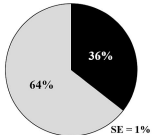

■ Non-Social    □ Social

3 months

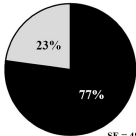

6 months

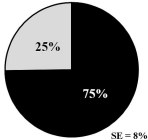

10 months

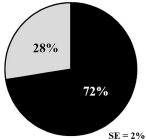

■ Non-Social   □ Social

Interactive

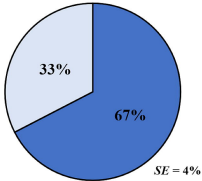

■ Not socially directed

Non-Interactive

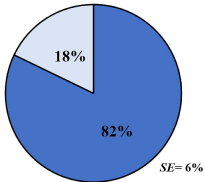

□ Socially directed
